# Supplementary material for: Core–shell molecularly imprinted polymer sensor for enrofloxacin determination in various matrices: a novel, sustainable One Health analytical strategy
Source: Royal Society of Chemistry journal article supplement (doi:10.1039/d4ay00914b), 2024-01-01
Supplement: d4ay00914b1.pdf [file d4ay00914b1.pdf]

## Supplementary Information

### **Core-Shell Molecularly Imprinted Polymer Sensor for Enrofloxacin Determination in Various Matrices: A Novel, Sustainable One Health Analytical Strategy**

**Mona T. Ragab<sup>a\*</sup>, Amr M. Mahmoud<sup>a</sup>, Heba M. Mohamed<sup>a</sup>**

<sup>a</sup> *Pharmaceutical Analytical Chemistry Department, Faculty of Pharmacy, Cairo University, Kasr El-Aini Street, Cairo 11562, Egypt*

\* *Correspondence author: E-mail: [mona.abdelhafez@pharma.cu.edu.eg](mailto:mona.abdelhafez@pharma.cu.edu.eg)*

#### **Supplementary Figures:**

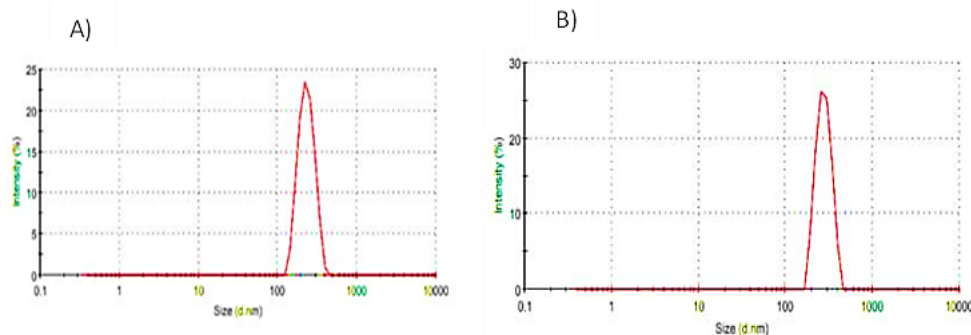

**Supplementary Material Fig.S1. The particle size of A) silica nanoparticles and B) the molecular imprinted polymer MIP 1 using Malvern Zetasizer Nano-ZS**

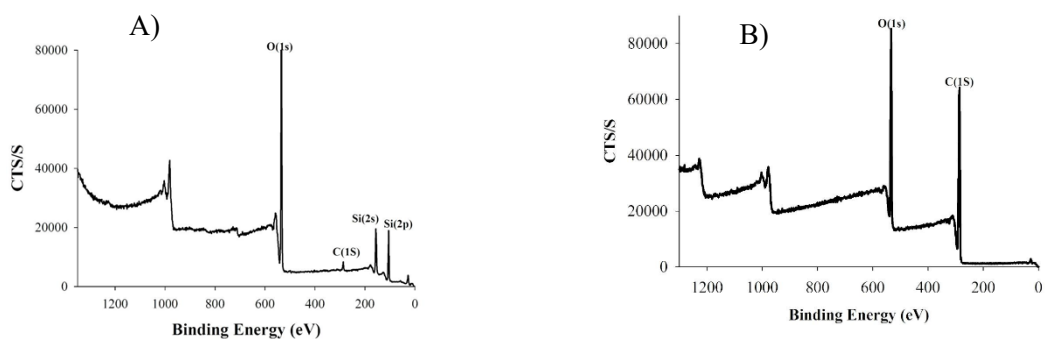

**Supplementary Material Fig. S2. X-Ray photoelectron spectroscopy spectra of A) the silica nanoparticles and B) the molecular imprinted polymer**

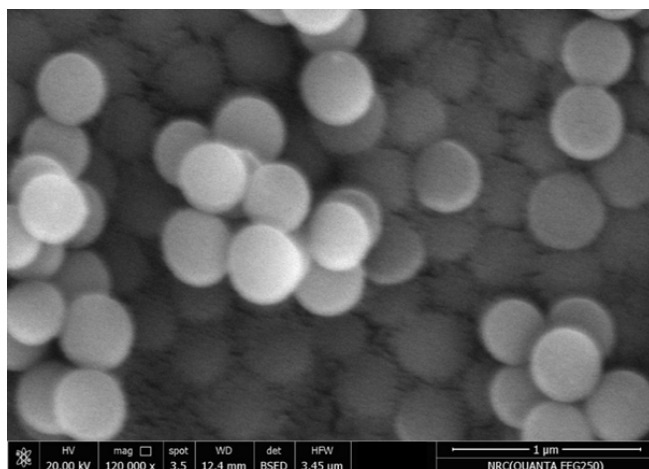

**Supplementary Material Fig. S3. SEM image of core-shell MIP beads.**

**Data for pH effect**

| pH | 10 <sup>-4</sup> | 10 <sup>-3</sup> |
|----|------------------|------------------|
| 2  | -253             | -182             |
| 3  | -259             | -187             |
| 4  | -259             | -189             |
| 5  | -267             | -199             |
| 6  | -281             | -234             |

### **Data for Temp effect**

| Conc (-log) | 20°C | 30°C | 35 °C |
|-------------|------|------|-------|
| 2           | -142 | -133 | -125  |
| 3           | -200 | -194 | -190  |
| 3.3         | -212 | -207 | -202  |
| 4           | -263 | -255 | -243  |
| 5           | -314 | -311 | -306  |

**Data for calibration curves obtained for ENR and some relevant concentrations of interfering ions, main metabolite and co-administered drug using the designed sensor.**

| -log Conc | ENR  | AMX  | CIP  | KCl  | Mg   | Ca   | Zn   | Na   | urea |
|-----------|------|------|------|------|------|------|------|------|------|
| 2         | -3   | -100 | -75  | -166 | -250 | -241 | -147 | -135 | -260 |
| 3         | -53  | -140 | -101 | -196 | -249 | -275 | -151 | -158 | -264 |
| 4         | -107 | -210 | -160 | -201 | -267 | -312 | -170 | -191 | -266 |
| 5         | -162 | -270 | -225 | -218 | -275 | -330 | -201 | -201 | -266 |

### **Software Access**

#### **- Greenness Assessment Software**

Software makes the assessment procedure straightforward. It is open-source and downloadable from <https://mostwiedzy.pl/AGREE>.

web app version of the tool: <https://agree-index.anvil.app/>

Windows download link [https://cdn.mostwiedzy.pl/ce/04/fe/87/0\\_202006252225192794921\\_FME/agree-sfx.exe](https://cdn.mostwiedzy.pl/ce/04/fe/87/0_202006252225192794921_FME/agree-sfx.exe)

#### **- White Analytical Chemistry Assessment**

The Excel worksheet as a template for assessments using the RGB 12 algorithm

<https://doi.org/10.1016/j.jtrac.2021.116223>
